# Supplementary material for: Advantages of Induced Circular Dichroism Spectroscopy for Qualitative and Quantitative Analysis of Solution-Phase Cyclodextrin Host–Guest Complexes
Source: MDPI journal article supplement (doi:10.3390/ijms25010412), 2023-12-28
Supplement: s1 [file s1]

## **Supplementary Material**

### **Advantages of Induced Circular Dichroism spectroscopy for qualitative and quantitative analysis of solution-phase cyclodextrin host-guest complexes.**

Márta Kraszni<sup>1</sup>, Balázs Balogh<sup>2</sup>, István Mándity<sup>2</sup> and Péter Horváth<sup>1\*</sup>

<sup>1</sup> Semmelweis University, Department of Pharmaceutical Chemistry, Hőgyes Endre utca 9,  
1092 Budapest, Hungary

<sup>2</sup> Semmelweis University, Department of Organic Chemistry, Hőgyes Endre utca 7, 1092  
Budapest, Hungary

\*to whom correspondence should be addressed:

Dr. Péter Horváth

Department of Pharmaceutical Chemistry, Semmelweis University

H-1092 Budapest, Hőgyes E. u. 9, Hungary

Phone/Fax: +3612170891

E-mail: horvath.peter@semmelweis.hu

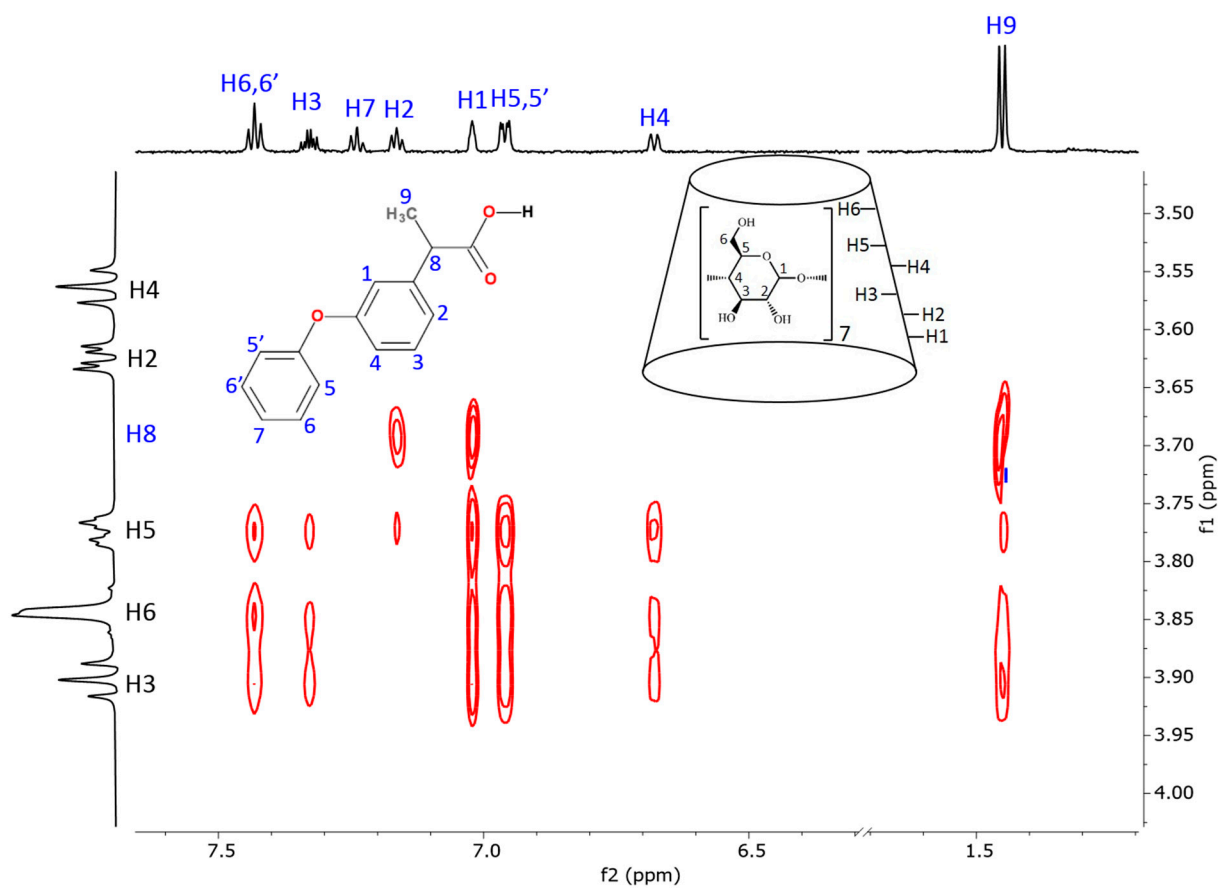

**Figure S1** The ROESY NMR spectrum of fenopropfen-BCyD 1:5 concentration ratio in 90% H<sub>2</sub>O/10% methanol-d<sub>4</sub>. Assignment of the signals in blue is for fenopropfen, in black is for BCyD.
